# Supplementary material
Source: ML conference proceedings conference paper supplement (https://proceedings.neurips.cc/paper_files/paper/2019/hash/8ce1a43fb75e779c6b794ba4d255cf6d-Abstract.html)
Supplement: Supplementary file [file 8ce1a43fb75e779c6b794ba4d255cf6d-Supplemental.zip]

---

# The Parameterized Complexity of Cascading Portfolio Scheduling (Full Version)

---

Anonymous Author(s)

Affiliation

Address

email

## Abstract

Cascading portfolio scheduling is a static algorithm selection strategy which uses a sample of test instances to compute an optimal ordering (a cascading schedule) of a portfolio of available algorithms. The algorithms are then applied to each future instance according to this cascading schedule, until some algorithm in the schedule succeeds. Cascading scheduling has proven to be effective in several applications, including QBF solving and generation of ImageNet classification models.

It is known that the computation of an optimal cascading schedule in the offline phase is NP-hard. In this paper we study the parameterized complexity of this problem and establish its fixed-parameter tractability by utilizing structural properties of the success relation between algorithms and test instances. Our findings are significant as they reveal that in spite of the intractability of the problem in its general form, one can indeed exploit sparseness or density of the success relation to obtain non-trivial runtime guarantees for finding an optimal cascading schedule.

## 1 Introduction

When dealing with hard computational problems, one often has access to a *portfolio* of different algorithms that can be applied to solve the given problem, with each of the algorithms having complementary strengths. There are various ways of how this performance complementarity can be exploited. Algorithm selection, a line of research initiated by Rice [21], studies various approaches one can use to select algorithms from the portfolio. Algorithm selection has proven to be an extremely powerful tool with many success stories in Propositional Satisfiability, Constraint Satisfaction, Planning, QBF Solving, Machine Learning and other domains [13, 14, 15, 22]. A common approach to algorithm selection is *per-instance-based algorithm selection*, where an algorithm is chosen for each instance independently, based on some features of the instance (see, *e.g.*, [16, 11]). However, sometimes information about the individual instances is not available or difficult to use. Then, one can instead make use of information about the distribution of the set of instances, *e.g.*, in terms of a representative sample of instances which can be used as a *training set*. In such cases, one can compute in an offline phase a suitable linear ordering of the algorithms, optimizing the ordering for the training set of instances. This ordering is then applied uniformly to any given problem instance in an online fashion—in particular, if the first algorithm in our ordering fails to solve a given instance (due to timeout, memory overflow, or due to not reaching a desired accuracy), then the second algorithm is called, and this continues until we solve the instance. Such a static algorithm selection, “*cascading portfolio scheduling*”, is simpler to implement than per-instance selection methods and can be very effective [24]. One prominent recent application of cascading portfolio scheduling lies in state-of-the-art *ImageNet classification models*, where it resulted in a significant speedup by reducing the number of floating-point operations [25]. Cascading portfolio scheduling is also related to online portfolio scheduling [12, 17].

In this paper we address the fundamental problem of finding an optimal cascading schedule for a given portfolio  $\mathcal{A}$  of algorithms with respect to a given training set  $T$  of instances. In particular, for the problem CASCADING PORTFOLIO SCHEDULING (or CPS for short) that we consider, we are given  $m$  algorithms,  $n$  test instances, and a *cost mapping* cost, where  $\text{cost}(\alpha, t)$  denotes the cost of running algorithm  $\alpha$  on test instance  $t$ , and a *success relation*  $S$  where  $(\alpha, t) \in S$  means that algorithm  $\alpha$  succeeds on test instance  $t$ . As the cost mapping and the success relation are defined independently, this setting is very general and entails different scenarios.

**Scenario 1** Each algorithm is run until a globally set timeout  $C$  is reached. If the algorithm  $\alpha$  solves test instance  $t$  in time  $c \leq C$  then  $\text{cost}(\alpha, t) = c$  and  $(\alpha, t) \in S$ ; otherwise we have  $\text{cost}(\alpha, t) = C$  and  $(\alpha, t) \notin S$ .

**Scenario 2** Algorithm  $\alpha$  solves a test instance  $t$  in time  $c$  and outputs an accuracy estimate  $r$  for its solution.  $r$  is then compared with a globally set accuracy threshold  $R$ . If  $r \geq R$  then  $(\alpha, t) \in S$ , otherwise  $(\alpha, t) \notin S$ ; in any case  $\text{cost}(\alpha, t) = c$ . Such a strategy has been used for prediction model generation [25].

**Scenario 3** All the algorithms are first run with a short timeout and if the test instance has not been solved after this, algorithms are run again without a timeout (a similar strategy has been used for QBF solving [19]). Such a strategy can be instantiated to our setting by adding two copies of each algorithm to the portfolio, one with a short timeout and one without a timeout.

**Contribution.** We establish the *fixed-parameter tractability*<sup>1</sup> of computing an optimal cascading schedule by utilizing structural properties of the success relation. We look at the success relation in terms of a Boolean matrix, the *evaluation matrix*, where each row corresponds to a test instance and each column corresponds to an algorithm. A cell contains the entry 1 iff the corresponding algorithm succeeds on the corresponding test. We show that if this matrix is either very sparse or very dense, then the computation of an optimal schedule is tractable. More specifically, we establish the following results, which we describe by writing CPS[*parm*] for CASCADING PORTFOLIO SCHEDULING parameterized by parameter *parm*.

First we consider the *algorithm failure degree* which is the largest number of tests a single algorithm fails on, and the *test failure degree* which is the largest number of algorithms that fail on a single test (these two parameters can also be seen as the largest number of 0's that appear in a row and the largest number of 0's that appear in a column of the matrix, respectively).

(1) CPS[*algorithm failure degree*] and CPS[*test failure degree*] are fixed-parameter tractable (Theorems 4 and 5).

It is natural to consider also the dual parameters *algorithm success degree* and *test success degree*. However, it follows from known results that CPS is already NP-hard if both of these parameters are bounded by a constant (Proposition 6). Hence, our results exhibit a certain asymmetry between failure and success degrees.

We then consider more sophisticated parameters that capture the sparsity or density of the evaluation matrix. The *failure cover number* is the smallest number of rows and columns in the evaluation matrix needed to cover all the 0's in the matrix; similarly, the *success cover number* is the smallest number of rows and columns needed to cover all the 1's. In fact, both parameters can be computed in polynomial time using bipartite vertex cover algorithms [8].

(2) CPS[*failure cover number*] and CPS[*success cover number*] are fixed-parameter tractable (Corollary 8 and Theorem 19).

These results are significant as they indicate that CASCADING PORTFOLIO SCHEDULING can be solved efficiently as long as the evaluation matrix is sufficiently sparse or dense. Our result for CPS[*failure cover number*] in fact also shows fixed-parameter tractability of the problem for an even more general parameter than success cover number: the treewidth [23] of the bipartite graph between the algorithms and tests, where edges join success pairs. This is our most technical contribution and reveals how a fundamental graphical parameter [see, e.g., 9] can be utilized for algorithm scheduling.

<sup>1</sup>Fixed-parameter tractability is a relaxation of polynomial tractability; definitions are provided in Section 2.

Another natural variant of the problem,  $\text{CPS}^{\text{opt}}[\text{length}]$ , arises by adding an upper bound  $\ell$  on the length, *i.e.*, cardinality, of the computed schedule, and asking for a schedule of length  $\leq \ell$  of minimum cost. We obtain a complexity classification of the problem under this parameterization as well.

(3)  $\text{CPS}[\text{length}]$  can be solved in polynomial time for each fixed bound  $\ell$ , but is not fixed-parameter tractable parameterized by  $\ell$  subject to established complexity assumptions.

## 2 Preliminaries

**Problem Definition.** An instance of the CASCADING PORTFOLIO SCHEDULING problem is a tuple  $(\mathcal{A}, T, \text{cost}, S)$  comprising:

- a set  $\mathcal{A}$  of  $m$  algorithms,
- a set  $T$  of  $n$  tests,
- a cost mapping  $\text{cost} : (\mathcal{A} \times T) \rightarrow \mathbb{N}$ , and
- a success relation  $S \subseteq \mathcal{A} \times T$ .

Let  $\tau$  be a totally ordered subset of  $\mathcal{A}$ ; we call such a set a *schedule*. The *length* of a schedule is its cardinality. We say that  $\tau$  is *valid* if for each test  $t$  there exists an algorithm  $\alpha \in \tau$  such that  $(\alpha, t) \in S$ . Throughout the paper, we will assume that there exists a valid schedule for our considered instances—or, equivalently, that each test is solved by at least one algorithm.

The *processing cost* of a test  $t$  for a valid schedule  $\tau = (\alpha_1, \dots, \alpha_q)$  is defined as  $\sum_{i=1}^j \text{cost}(\alpha_i, t)$ , where  $j$  is the *first* algorithm in  $\tau$  such that  $(\alpha_j, t) \in S$ . The *cost* of a valid schedule  $\tau$ , denoted  $\text{cost}(\tau)$ , is the sum of the processing costs of all tests in  $T$  for  $\tau$ . The aim in CASCADING PORTFOLIO SCHEDULING is to find a valid schedule  $\tau$  of minimum cost.

**Parameterized Complexity.** In parameterized algorithmics [7, 5, 4, 10] the complexity of a problem is studied not only with respect to the input size  $n$  but also a parameter  $k \in \mathbb{N}$ . The most favorable complexity class in this setting is FPT (*fixed-parameter tractable*) which contains all problems that can be solved by an algorithm running in time  $f(k) \cdot n^{\mathcal{O}(1)}$ , where  $f$  is a computable function. Algorithms running in this time are called *fixed-parameter algorithms*. We will also make use of the complexity classes W[2] and XP, where  $\text{W}[2] \subseteq \text{XP}$ . Problems complete for W[2] are widely believed to not be in FPT. The class XP contains problems that are solvable in time  $\mathcal{O}(n^{f(k)})$ , where  $f$  is a computable function; in other words, problems in XP are polynomial-time solvable when the parameter is bounded by a constant. To obtain our lower bound results, we will need the notion of a parameterized reduction, referred to as *FPT-reduction*, which is in many ways analogous to the standard polynomial-time reductions; the distinction is that a parameterized reduction runs in time  $f(k) \cdot n^{\mathcal{O}(1)}$  for some computable function  $f$ , and provides upper bounds on the parameter size in the resulting instance [5, 4, 7, 18].

We write  $\mathcal{O}^*(f(k))$  to denote a function of the form  $f(k) \cdot n^{\mathcal{O}(1)}$ , where  $n$  is the input length and  $k$  is the parameter.

**Problem Parameters.** CASCADING PORTFOLIO SCHEDULING is known to be NP-hard [25], and our aim in this paper will be to circumvent this by obtaining parameters that exploit the fine-grained structure in relevant problem instances. We note that we explicitly aim for results which allow for arbitrary cost mappings, since these are expected to consist of large (and often disorderly) numbers in real-life settings. Instead, we will consider parameters that restrict structural properties of the “binary” success relation. To visualize this success relation, it will be useful to view an instance  $\mathcal{I}$  as an  $m \times n$  matrix  $M_{\mathcal{I}}$  where  $M_{\mathcal{I}}[i, j] = 1$  if  $(\alpha_i, t_j) \in S$  (*i.e.* if the  $j$ -th test succeeds on the  $i$ -th algorithm, for some fixed ordering of algorithms and tests), and  $M_{\mathcal{I}}[i, j] = 0$  otherwise.

The two most natural parameters to consider are  $m$  and  $n$ , and these correspond to the number of rows and columns in  $M_{\mathcal{I}}$ , respectively. Unfortunately, these two parameters are also fairly restrictive—it is unlikely that instances of interest will have a very small number of algorithms or test instances. Another option would be to use the maximum number of times an algorithm (or test) can fail (or succeed) as a parameter. In particular, the *algorithm success (or failure) degree* is the maximum number of 1’s (or 0’s, respectively) occurring in any row in  $M_{\mathcal{I}}$ . Similarly, we let the *test success (or failure) degree* be the maximum number of 1’s (or 0’s, respectively) occurring in any column in  $M_{\mathcal{I}}$ . Instances where these parameters are small correspond to cases where “almost everything” either fails or succeeds.

$$\begin{array}{c}
\begin{matrix} & t_1 & t_2 & t_3 & t_4 & t_5 \\ \alpha_1 & \begin{pmatrix} 1 & 1 & 1 & 0 & 1 \end{pmatrix} \\ \alpha_2 & \begin{pmatrix} 0 & 0 & 1 & 0 & 1 \end{pmatrix} \\ \alpha_3 & \begin{pmatrix} 0 & 1 & 0 & 1 & 0 \end{pmatrix} \\ \alpha_4 & \begin{pmatrix} 1 & 1 & 1 & 0 & 1 \end{pmatrix} \end{matrix} \\
M_{\mathcal{I}}
\end{array}
\quad
\begin{array}{c}
\begin{pmatrix} 1 & 5 & 2 & 7 & 3 \\ 7 & 7 & 3 & 7 & 5 \\ 7 & 1 & 7 & 6 & 7 \\ 2 & 5 & 3 & 7 & 4 \end{pmatrix} \\
C_{\mathcal{I}}
\end{array}$$

Figure 1: An instance with 4 algorithms and 5 tests in the setting where (exact) algorithms are executed with a global timeout of 7, as discussed in Scenario 1. On the left is the matrix  $M_{\mathcal{I}}$  representing the success relation. The failure covering number is 3, as witnessed by the highlighted two rows and one column. The matrix  $C_{\mathcal{I}}$  on the right represents the cost relation, with  $C_{\mathcal{I}}[i, j] = \text{cost}[\alpha_i, t_j]$ . The instance  $\mathcal{I}$  depicted here has a single solution, notably  $(\alpha_1, \alpha_3)$ .

A more advanced parameter that can be extracted from  $M_{\mathcal{I}}$  is the covering number, which intuitively captures the minimum number of rows and columns that are needed to “cover” all successes (or failures) in the matrix. More formally, we say that an entry  $M_{\mathcal{I}}[i, j]$  is covered by row  $i$  and by column  $j$ . Then the *success (or failure) covering number* is the minimum value of  $r + c$  such that there exist  $r$  rows and  $c$  columns in  $M_{\mathcal{I}}$  with the property that each occurrence of 1 (or 0, respectively) in  $M_{\mathcal{I}}$  is covered by one of these rows or columns. Intuitively, an instance has success covering number  $s$  if there exist  $r$  algorithms and  $s - r$  tests such that these have a non-empty intersection with every relation in  $S$ —see Figure 2 for an example. We note that the covering number has been used as a structural parameter of matrices, notably in previous work on the MATRIX COMPLETION problem [8], and that it is possible to compute  $r$  algorithms and  $c$  tests achieving a minimum covering number in polynomial time [8, Proposition 1]. We will denote the success covering number by  $\text{cov}_s$  and the failure covering number by  $\text{cov}_f$ .

### 3 Results for Basic Parameters

In this section we consider the CASCADING PORTFOLIO SCHEDULING problem parameterized by the *number of algorithms* (i.e., by  $m = |\mathcal{A}|$ ), by the *number of tests* (i.e., by  $n = |T|$ ), and by the *length* of the computed schedule.

We begin mapping the complexity of our problem with two initial propositions. Note that both propositions can also be obtained as corollaries of the more general Theorem 19, presented later. Still, we consider it useful to present the proof of Proposition 1, since it nicely introduces the combinatorial techniques that will later be extended in the proof of Theorem 1.

**Proposition 1.** CPS[number of algorithms] is in FPT.

*Proof.* We reduce the problem to that of finding a minimum-weight path in a directed acyclic graph (DAG)  $D$ . We construct  $D$  as follows. We create a single source vertex  $s$ , and a single destination vertex  $t$  in  $D$ . We define  $L_0 = \{s\}$ ,  $L_{m+1} = \{t\}$ , and apart from  $t$ ,  $D$  contains  $m$  layers,  $L_0, \dots, L_m$ , of vertices, where layer  $L_i$ , for  $i \in \{0, \dots, m\}$ , contains a vertex for each subset of  $\mathcal{A}$  of cardinality  $i$ , with vertex  $s$  corresponding to the empty set. We connect each vertex that corresponds to a subset of  $\mathcal{A}$  which is a valid portfolio to  $t$ . For each vertex  $u$  in layer  $L_i$ ,  $i \in \{0, \dots, m-1\}$ , corresponding to a subset  $S_u \subset \mathcal{A}$ , and each vertex  $v$  in  $L_{i+1}$  corresponding to a subset  $S_v \subseteq \mathcal{A}$ , where  $S_v = S_u \cup \{\alpha\}$ , for  $\alpha \in \mathcal{A}$ , we add an edge  $(u, v)$  if there exists a test  $t \in T$  such that (1)  $(\alpha, t) \in S$  and (2) there does not exist  $\beta \in S_u$  such that  $(\beta, t) \in S$ ; in such case the weight of  $(u, v)$ ,  $wt(u, v)$ , is defined as follows. Let  $T_\alpha \subseteq T$  be the set of tests that cannot be solved by any algorithm in  $S_u$ . Then  $wt(u, v) = \sum_{t \in T_\alpha} \text{cost}(\alpha, t)$ . Informally speaking, the weight of  $(u, v)$  is the additional cost incurred by appending algorithm  $\alpha$  to any (partial) portfolio consisting of the algorithms in  $S_u$ . This completes the construction of  $D$ .

It is not difficult to see that an optimal portfolio for  $\mathcal{A}$  corresponds to a minimum-weight path from  $s$  to  $t$ . More specifically, if  $P = (v_0 = s, v_1, \dots, v_r, t)$  is a minimum-weight  $s$ - $t$  path in  $D$ , then the schedule  $(\alpha_1, \dots, \alpha_r)$ , where  $\{\alpha_i\} = S_{v_i} \setminus S_{v_{i-1}}$  ( $S_{v_i}$  is the subset of algorithms corresponding to  $v_i$  and  $S_{v_{i-1}}$  that corresponding to  $v_{i-1}$ ), for  $i \in [r]$ , is an optimal schedule for  $T$ . The number of vertices in  $D$  is  $2^m + 1$ , the number of edges  $\mathcal{O}(2^m m^2)$ , and computing a minimum-weight path in  $D$  can be done in linear time in the size of  $D$  [3], which is  $\mathcal{O}^*(2^m)$ . It follows that the problem can be solved in time  $\mathcal{O}^*(2^m)$ .  $\square$

**Proposition 2.** CPS[number of tests] is in FPT.

To formally capture the parameterization of the problem by the length  $\ell$  of the computed schedule, we need to slightly adjust its formal definition. Let  $\text{CPS}^{\text{val}}[\text{length}]$  and  $\text{CPS}^{\text{opt}}[\text{length}]$  denote the variants of CASCADING PORTFOLIO SCHEDULING where for each problem instance we are also given an integer  $\ell > 0$  and only schedules up to length  $\ell$  are considered ( $\ell$  being the parameter).  $\text{CPS}^{\text{val}}[\text{length}]$  is the decision problem that asks whether there exists a valid schedule of length  $\leq \ell$ ,

185 and  $\text{CPS}^{\text{opt}}[\text{length}]$  asks to compute a valid schedule of length  $\leq \ell$  of smallest cost or decide that no  
 186 valid schedule of length  $\leq \ell$  exists. Both problems are parameterized by the length  $\ell$ .

187 **Proposition 3.**  $\text{CPS}^{\text{opt}}[\text{length}]$  is in XP, but is unlikely to be in FPT since already  $\text{CPS}^{\text{val}}[\text{length}]$  is  
 188 W[2]-complete.

189 *Proof.* Membership of  $\text{CPS}^{\text{opt}}[\text{length}]$  in XP is easy: We enumerate every ordered selection of at  
 190 most  $\ell$  algorithms from  $\mathcal{A}$  (there are at most  $\mathcal{O}(\ell!m^\ell)$  many) and if valid, we compute its cost, and  
 191 keep track of a valid selection (if any) of minimum cost over all enumerations.

192 To prove the W[2]-completeness of  $\text{CPS}^{\text{val}}[\text{length}]$ , we give FPT-reductions from and to the W[2]-  
 193 complete problem SET COVER [5]. The reduction to SET COVER (showing membership in W[2]) is  
 194 straightforward: The set of tests  $T$  is the ground set  $U$  of the constructed instance of SET COVER, and  
 195 for each algorithm  $\alpha \in \mathcal{A}$ , we add to the family of subsets of  $U$ ,  $\mathcal{F}$ , a set  $F_\alpha = \{t \in T \mid (\alpha, t) \in S\}$ .  
 196 It is clear that the resulting instance of SET COVER has a cover of size at most  $\ell$  iff there a valid  
 197 cascading portfolio scheduling of length at most  $\ell$ , and hence the above reduction is an FPT-reduction  
 198 to SET COVER.

199 Next, we give an FPT-reduction from SET COVER to our problem. Given an instance  $((U, \mathcal{F}), k)$   
 200 of SET COVER, where  $U$  is a ground set of elements,  $\mathcal{F}$  is a family of subsets for  $U$ , and  $k \in \mathbb{N}$  is  
 201 the parameter, we create an instance of CASCADING PORTFOLIO SCHEDULING as follows. We set  
 202  $T = U$ , and for each  $F \in \mathcal{F}$ , we create an algorithm  $\alpha_F \in \mathcal{A}$  and add  $(\alpha_F, t)$  to  $S$ , for every  $t \in F$ .  
 203 Finally, we set  $\ell = k$ . The function *cost* can be defined arbitrarily. The above reduction is clearly a  
 204 (polynomial-time) FPT-reduction, and it is straightforward to verify that  $((U, \mathcal{F}), k)$  is a yes-instance  
 205 of SET COVER if and only if the constructed instance of CASCADING PORTFOLIO SCHEDULING  
 206 has a valid portfolio of size at most  $\ell$ .  $\square$

## 207 4 Results for Degree Parameters

208 This section presents a classification of the complexity of CASCADING PORTFOLIO SCHEDULING  
 209 parameterized by the considered (success and failure) degree parameters.

210 **Proposition 4.**  $\text{CPS}[\text{algorithm failure degree}]$  is in FPT.

211 *Proof.* Denote by  $\deg_f^{\mathcal{A}}$  the algorithm failure degree, and let  $\mathcal{I} = (\mathcal{A}, T, \text{cost}, S)$  be an instance of  
 212 CASCADING PORTFOLIO SCHEDULING. Consider an algorithm which loops over each algorithm  
 213  $\alpha \in \mathcal{A}$  and proceeds under the assumption that  $\alpha$  is the first algorithm in an optimal valid portfolio.  
 214 For each such  $\alpha$ , the number of tests in  $T$  that cannot be evaluated by  $\alpha$  is at most  $\deg_f^{\mathcal{A}}$ . Removing  
 215  $\alpha$  from  $\mathcal{A}$  and the subset of tests  $\{t \mid (\alpha, t) \in S\}$  from  $T$  results in an instance  $\mathcal{I}^-$  of CASCADING  
 216 PORTFOLIO SCHEDULING with at most  $\deg_f^{\mathcal{A}}$  tests, which, by Proposition 2, can be solved in time  
 217  $\mathcal{O}^*((\deg_f^{\mathcal{A}})^{\deg_f^{\mathcal{A}}})$  to obtain an optimal solution for  $\mathcal{I}^-$ . Prefixing  $\alpha$  to the optimal solution obtained  
 218 for  $\mathcal{I}^-$  (assuming a solution exists) results in an optimal solution  $S_\alpha$  for  $\mathcal{I}$  under the constraint  
 219 that algorithm  $\alpha$  is the first algorithm. Enumeration every algorithm  $\alpha \in \mathcal{A}$  as the first algorithm,  
 220 computing  $S_\alpha$ , and keeping track of the solution of minimum cost over all enumerations, results in  
 221 an optimal solution for  $\mathcal{I}$ . The running time of the above algorithm is  $\mathcal{O}^*((\deg_f^{\mathcal{A}})^{\deg_f^{\mathcal{A}}})$ .  $\square$

222 **Proposition 5.**  $\text{CPS}[\text{test failure degree}]$  is in FPT.

223 *Proof Sketch.* Denote by  $\deg_f^T$  the test failure degree, and let  $\mathcal{I} = (\mathcal{A}, T, \text{cost}, S)$  be an instance of  
 224 CASCADING PORTFOLIO SCHEDULING. Consider an algorithm which (1) loops over each algorithm  
 225  $\alpha \in \mathcal{A}$  and proceeds under the assumption that  $\alpha$  is the last algorithm in an optimal valid portfolio  $\tau$ ,  
 226 and then (2) loops over every test  $t$  in our instance and proceed under the assumption that  $t$  is a test  
 227 that is solved *only* by  $\alpha$  in  $\tau$ . For each such choice of  $t$  and  $\alpha$ , it follows that the algorithms preceding  
 228  $\alpha$  in  $\tau$  *do not* solve  $t$ , and hence there are at most  $\deg_f^T$  many such algorithms. Therefore, we can  
 229 check the validity and compute the cost of every possible ordered selection of a subset from these  
 230 algorithms that precede  $\alpha$  in  $\tau$ . After we finish looping over all choices of  $\alpha$  and  $t$ , we output a valid  
 231 portfolio of minimum cost.

232 There are  $|\mathcal{A}|$  choices for a last algorithm  $\alpha$  and  $|T|$  choices for a desired test  $t$ . For each fixed  $\alpha$  and  
 233  $t$ , there are at most  $\mathcal{O}^*((\deg_f^T)!)^{\deg_f^T}$  many ordered selections of a subset of algorithms preceding  $\alpha$  in  $\tau$ .  
 234 It follows that the problem can be solved in time  $\mathcal{O}^*((\deg_f^T)!)^{\deg_f^T}$ .  $\square$

235 **Proposition 6.** CPS[algorithm success degree], CPS[test success degree], and even CPS[algorithm  
236 success degree + test success degree] are NP-hard already if the algorithm success degree is at most  
237 3 and test success degree is at most 2.

238 *Proof.* We reduce from the problem 3-MIN SUM VERTEX COVER, where we are given a graph  
239  $H = (V, E)$  with maximum degree 3, and the task is to find a bijection  $\sigma : V \rightarrow \{1, \dots, V\}$  that  
240 minimizes  $\sum_{e \in E} f_\sigma(e)$ , where  $f_\sigma(e) = \min_{v \in e} \sigma(v)$ . Feige *et al.* [6] showed that there exists  
241  $\epsilon > 0$  such that it is NP-hard to approximate 3-MIN SUM VERTEX COVER within a ratio better  
242 than  $1 + \epsilon$ . Given an instance of this problem, we construct an instance of  $(\mathcal{A}, T, \text{cost}, S)$  of  
243 CASCADING PORTFOLIO SCHEDULING by letting  $\mathcal{A} = V$ , adding for each edge  $e \in E$  a test  $t_e$  to  
244  $T$ , setting  $S = \{(\alpha, t_e) \in \mathcal{A} \times T : \alpha \in e\}$ , and setting  $\text{cost}(\alpha, t) = 1$  for all  $\alpha \in \mathcal{A}$  and  $t \in T$ . It is  
245 easy to verify that bijections  $\sigma$  that minimize  $\sum_{e \in E} f_\sigma(e)$  are exactly those that give an ordering  $\tau$   
246 of  $\mathcal{A}$  of minimal cost. It remains to observe that the the algorithm success degree is 3 and the test  
247 success degree is 2.  $\square$

## 248 5 Results for Cover Numbers

249 In this section we show that CPS[failure cover number] and CPS[success cover number] are both  
250 fixed-parameter tractable.

### 251 5.1 Using the Failure Cover Number

252 The first of the two results follows from an even more general result, the fixed-parameter tractability  
253 of CPS[failure treewidth], where as the parameter we take the *treewidth* of the failure graph  $G_{\mathcal{I}}$   
254 defined as follows.

255 The failure graph  $G_{\mathcal{I}}$  is a bipartite graph whose vertices consist of  $\mathcal{A} \cup T$  and where there is an edge  
256 between  $\alpha \in \mathcal{A}$  and  $t \in T$  iff  $t$  fails on  $\alpha$ . We note that the algorithm (or test) failure degree naturally  
257 corresponds to the maximum degree in the respective bipartition of  $G_{\mathcal{I}}$ , and that the failure covering  
258 number is actually the size of a minimum vertex cover in  $G_{\mathcal{I}}$ .

259 Treewidth [23, 9, 1] is a well-established graph parameter that measures the “tree-likeness” of  
260 instances. Aside from treewidth, we will also need the notion of *balanced separators* in graphs. We  
261 introduce these technical notions below.

262 **Treewidth and Separators.** Let  $G = (V, E)$  be a graph. A *tree decomposition* of  $G$  is a pair  
263  $(\mathcal{V}, \mathcal{T})$  where  $\mathcal{V}$  is a collection of subsets of  $V$  such that  $\bigcup_{X_i \in \mathcal{V}} X_i = V$ , and  $\mathcal{T}$  is a rooted tree whose  
264 node set is  $\mathcal{V}$ , such that:

- 265 1. For every edge  $\{u, v\} \in E$ , there is an  $X_i \in \mathcal{V}$ , such that  $\{u, v\} \subseteq X_i$ ; and
- 266 2. for all  $X_i, X_j, X_k \in \mathcal{V}$ , if the node  $X_j$  lies on the path between the nodes  $X_i$  and  $X_k$  in the  
267 tree  $\mathcal{T}$ , then  $X_i \cap X_k \subseteq X_j$ .

268 The *width* of the tree decomposition  $(\mathcal{V}, \mathcal{T})$  is defined to be  $\max\{|X_i| \mid X_i \in \mathcal{V}\} - 1$ . The *treewidth*  
269 of the graph  $G$ , denoted  $\text{tw}(G)$ , is the minimum width over all tree decompositions of  $G$ . A tree  
270 decomposition  $(\mathcal{V}, \mathcal{T})$  is *nice* if it satisfies the following conditions:

- 271 1. Each node in the tree  $\mathcal{T}$  has at most two children.
- 272 2. If a node  $X_i$  has two children  $X_j$  and  $X_k$  in the tree  $\mathcal{T}$ , then  $X_i = X_j = X_k$ ; in this case  
273 node  $X_i$  is called a *join node*.
- 274 3. If a node  $X_i$  has only one child  $X_j$  in the tree  $\mathcal{T}$ , then either  $|X_i| = |X_j| + 1$  and  $X_j \subset X_i$ ,  
275 and in this case  $X_i$  is called an *insert node*; or  $|X_i| = |X_j| - 1$  and  $X_i \subset X_j$ , and in this  
276 case  $X_i$  is called a *forget node*.
- 277 4. If  $X_i$  is a leaf node or the root, then  $X_i = \emptyset$ .

278 A pair of vertex subsets  $(A, B)$  is a *separation* in graph  $G$  if  $A \cup B = V(G)$  and there is no edge  
279 between  $A \setminus B$  and  $B \setminus A$ . The *separator* of this separation is  $A \cap B$ , and the *order* of separation  
280  $(A, B)$  is equal to  $|A \cap B|$ . We say that a separation  $(A, B)$  of  $G$  is an  $\alpha$ -*balanced* separation if  
281  $|A \setminus B| \leq \alpha|V(G)|$  and  $|B \setminus A| \leq \alpha|V(G)|$ .

282 **Proof Strategy.** Our main aim in this section will be to prove the following theorem:

283 **Theorem 7.**  $\text{CPS}[\text{failure treewidth}]$  is in FPT.

284 It is easy to see that failure treewidth is at most the failure cover number plus 1 (consider, *e.g.*, a tree  
285 decomposition of the failure graph consisting of a sequence of bags, each containing the algorithms  
286 and tests forming the cover and one additional test or algorithm). Hence, once we establish Theorem 7  
287 we obtain the following as an immediate corollary:

288 **Corollary 8.**  $\text{CPS}[\text{failure cover number}]$  is in FPT.

289 The proof of Theorem 7 is broken into two main steps, and we provide a high-level overview of these  
290 below.

291 In the first step, we show that there exists an optimal solution of size at most  $\mathcal{O}(\text{tw}(G_{\mathcal{I}}) \cdot \log(m + n))$ .  
292 To argue this property, we consider a balanced separator  $B$  of  $G_{\mathcal{I}}$  of size  $\text{tw}(G_{\mathcal{I}}) + 1$ , and assume  
293 w.l.o.g. that, in an optimal solution, an algorithm on the left side of  $B$  occurs before an algorithm on  
294 the right side of  $B$ . It can be shown that there exists an optimal solution which behaves as follows:  
295 the first algorithm located on the right side of  $B$  is followed by at most  $\text{tw}(G_{\mathcal{I}}) + 1$  other algorithms.  
296 With this insight, we can show that  $\text{tw}(G_{\mathcal{I}}) + 3$  many algorithms solve at least a constant fraction of  
297 all tests in the instance. Applying this argument recursively allows us to obtain the desired bound on  
298 the size of the optimal solution.

299 In the second step, we solve the problem using dynamic programming on a tree decomposition of  
300  $G_{\mathcal{I}}$ , by utilizing the upper bound on the solution length derived in the first step. The running time is  
301  $\mathcal{O}^*(4^t \cdot \ell^{\text{tw}(G_{\mathcal{I}})} \cdot \text{tw}(G_{\mathcal{I}})!)$ . To make the dynamic programming approach work, for a current bag in  
302 the tree decomposition, and for each position in the schedule, we remember whether this position will  
303 be filled by an algorithm from the “future” (*i.e.*, has not been seen yet), whether it was already filled  
304 in the “past”, or whether it will be filled by an algorithm from the current bag. We also remember  
305 specifically which algorithm is the “first” from the future, which is the “first” from the past, and what  
306 are the positions of the algorithms in the bag. Moreover, for each test in the bag, we remember the  
307 position of the algorithm that solves the test.

308 **The Proof.** We start with the following lemma:

309 **Lemma 9.** *There exists a minimum cost schedule for CASCADING PORTFOLIO SCHEDULING with*  
310 *length at most  $(2\text{tw}(G_{\mathcal{I}}) + 5) \cdot \log(m + n)$ .*

311 *Proof.* As our starting point, we establish the following claim concerning *proper valid schedules*,  
312 which are schedules where each algorithm solves at least one test that has not been solved by previous  
313 algorithms.

314 **Claim 10.** *Let  $(A, B)$  be a separation in  $G_{\mathcal{I}}$  with separator  $X = A \cap B$ . Then in every proper valid*  
315 *schedule, either all the algorithms from  $A \setminus X$  or all the algorithms from  $B \setminus X$  are among the last*  
316  *$|X \cap T| + 1$  scheduled algorithms.*

317 *Proof of Claim.* Let  $\tau$  be such a valid schedule. Assume, w.l.o.g., that an algorithm  $\alpha_A \in A \setminus X$  is  
318 scheduled before any algorithm from  $B \setminus X$ , and let  $\alpha_B \in B \setminus X$  be the first algorithm from  $B \setminus X$   
319 in  $\tau$ . Since  $(A, B)$  is a separation in the failure graph with separator  $X$ , every algorithm in  $A \setminus X$   
320 solves every test in  $B \setminus X$  and vice versa. Hence, it is easy to see that the only tests that may not  
321 have been solved when  $\tau$  passes  $\alpha_B$  are tests in  $X$ . Since in  $\tau$  every algorithm solves at least one  
322 new test, there are at most  $|X \cap T|$  algorithms scheduled after  $\alpha_B$ , and the claim follows.  $\square$

323 Let  $\mathcal{I} = (\mathcal{A}, T, \text{cost}, S)$  be an instance of CASCADING PORTFOLIO SCHEDULING. We will prove  
324 the lemma by induction on  $|\mathcal{A}| + |T|$  and by restricting our attention to proper valid schedules only;  
325 the latter is justified by the fact that every valid schedule can be turned into a proper valid schedule  
326 without increasing its cost. Clearly, if  $|\mathcal{A}| + |T| \leq 2$  then the lemma holds.

327 Now let us assume inductively, for every instance  $\mathcal{I}' = (\mathcal{A}', T', \text{cost}', S')$  with  $|\mathcal{A}'| + |T'| < |\mathcal{A}| + |T|$ ,  
328 that every proper valid schedule has length at most  $(2\text{tw}(G_{\mathcal{I}'} + 5) \cdot \log(|\mathcal{A}'| + |T'|))$ . Let  $\tau$  be such a  
329 valid schedule for  $\mathcal{I}$ , and let  $(A, B)$  be a  $\frac{2}{3}$ -balanced separation in  $G_{\mathcal{I}}$  with separator  $X$  of size at  
330 most  $\text{tw}(G_{\mathcal{I}}) + 1$ , it is well known that such separation always exists (see, *e.g.*, [4, Lemma 7.20]).  
331 If the length of  $\tau$  is at most  $2|X| + 3$ , then we are done. Otherwise, the sets  $A, B, X$  satisfy the  
332 conditions of Claim 10, and hence all the algorithms from one of the parts, say  $B \setminus X$ , are among the  
333 last  $|X \cap T| + 1$  scheduled algorithms. Moreover, since  $\tau$  contains more than  $2|X| + 3$  algorithms,  
334 there is an algorithm  $\alpha_A$  that is the first algorithm from  $A \setminus X$  in  $\tau$ . Now let  $\mathcal{I}' = (\mathcal{A}', T', \text{cost}', S')$   
335 be the instance obtained from  $\mathcal{I}$  by removing:

- $\alpha_A$  and all tests solved by  $\alpha_A$ ,
- all tests and algorithms in  $B \setminus X$ , and
- all tests solved in  $\tau$  by some algorithm in  $B \setminus X$  and no algorithm before them in the schedule.

Note that  $|\mathcal{A}'| + |T'| \leq \frac{2}{3}(|\mathcal{A}| + |T|)$ . Now let  $\tau'$  be the schedule obtained from  $\tau$  by removing  $\alpha_A$ , all algorithms from  $B$ , and all algorithms from  $X$  that appear before  $\alpha_A$  and only succeed on tests in  $B$ . Note that we removed at most  $1 + |X \cap T| + 1 + |X \cap \mathcal{A}| = |X| + 2$  algorithms from  $\tau$ . Now, since after  $\alpha_A$  all the tests in  $B \setminus X$  were solved and every algorithm in  $\tau$  solves at least one new test (*i.e.*, a test not solved by previous algorithms), it follows that every algorithm in  $\tau'$  solves at least one new test. Moreover, we removed from  $T'$  all the tests that were solved in  $\tau$  by  $\alpha_A$  or an algorithm in  $B$  and hence  $\tau'$  is a valid schedule for  $\mathcal{I}'$ . Finally, note that  $tw(G_{\mathcal{I}'}) < tw(G_{\mathcal{I}})$ . Hence by our assumption the length of  $\tau'$  is at most  $(2tw(G_{\mathcal{I}}) + 5) \log(|\mathcal{A}'| + |T'|) \leq (2tw(G_{\mathcal{I}}) + 5) \log(\frac{2}{3}(|\mathcal{A}| + |T|)) = (2tw(G_{\mathcal{I}}) + 5) \log(|\mathcal{A}| + |T|) - (2tw(G_{\mathcal{I}}) + 5) \log(\frac{3}{2})$ . The lemma then follows by the fact that  $tw(G_{\mathcal{I}}) + 3 < (2tw(G_{\mathcal{I}}) + 5) \log(\frac{3}{2})$  for  $tw(G_{\mathcal{I}}) \geq 1$ .  $\square$

This concludes the first step towards the proof of Theorem 7. For the second step, we need to show the following lemma:

**Lemma 11.** *A minimum cost schedule for CASCADING PORTFOLIO SCHEDULING among the schedules of length exactly  $\ell$  can be computed in time  $\mathcal{O}^*(4^\ell \cdot \ell^{\text{tw}} \cdot \text{tw}!)$ .*

*Proof Sketch.* As with virtually all fixed-parameter algorithms parameterized by treewidth, we use leaf-to-root dynamic programming along a nicetree decomposition (in this case of the failure graph  $G_{\mathcal{I}}$ )—see for instance the numerous examples presented in the literature [5, 4]. However, due to the specific nature of our problem, the records dynamically computed by the program are far from standard. This can already be seen by considering the size of our records: while most such dynamic programming algorithms only store records that have size bounded by a function of the treewidth, in our case the records will also have a polynomial dependence on  $m$ .

As a starting point, we will use the known algorithm of Bodlaender *et al.* [2] to compute a nicetree-decomposition of width at most  $5 \cdot \text{tw}(G_{\mathcal{I}})$ . We proceed by formalizing the used records. Let  $X_i$  be a bag in the tree decomposition. A *configuration* w.r.t.  $X_i$  is a tuple  $(\alpha_{\text{past}}, \alpha_{\text{future}}, \sigma, \delta)$ , where

- $\alpha_{\text{past}}$  is an algorithm that has been forgotten in a descendant of  $X_i$ ,
- $\alpha_{\text{future}}$  is an algorithm that has not been introduced yet in  $X_i$ ,
- $\sigma : [\ell] \rightarrow \{\text{“past”}, \text{“future”}\} \cup (\mathcal{A} \cap X_i)$ , and
- $\delta : T \cap X_i \rightarrow [\ell]$ .

The interpretation of the configuration is that  $\sigma[j]$  tells us whether the  $j$ -th algorithm in the final schedule has been already introduced and forgotten (“past”), it is a specific algorithm in the bag  $X_i$ , or it has not been introduced yet (“future”). The function  $\delta$ , for a test  $t$ , tells us that  $t$  is solved by the  $\delta[t]$ -th algorithm and not solved by any algorithm before. The entries  $\alpha_{\text{past}}$  and  $\alpha_{\text{future}}$  represent the specific algorithms with the lowest indices  $j, j'$  with  $\sigma[j] = \text{“past”}$  and  $\sigma[j'] = \text{“future”}$ , respectively. We will refer to the index  $j$  such that  $\sigma[j] = \text{“past”}$  for all  $j' < j$  is  $\sigma[j'] \neq \text{“past”}$  as *the index of the first “past”* and, similarly, to the index  $j$  such that  $\sigma[j] = \text{“future”}$  and for all  $j' < j$  is  $\sigma[j'] \neq \text{“future”}$  as *the index of the first “future”*. Note that the indices of the first “past” and the first “future”, respectively, are interpreted as precisely the positions of  $\alpha_{\text{past}}$  and  $\alpha_{\text{future}}$  in the schedule.

We say that a configuration  $C = (\alpha_{\text{past}}, \alpha_{\text{future}}, \sigma, \delta)$  w.r.t.  $X_i$  is *admissible* if

- for each algorithm  $\alpha \in \mathcal{A} \cap X_i$ , there exists precisely one index  $j$  such that  $\sigma[j] = \alpha$ ;
- if  $\delta[t] = j$ , then for every  $j' < j$ :
  - if  $\sigma[j'] \in \mathcal{A} \cap X_i$  then  $\sigma[j']$  does not solve  $t$ , and
  - if  $\sigma[j'] = \text{“past”}$  (resp.  $\sigma[j'] = \text{“future”}$ ), then  $\alpha_{\text{past}}$  (resp.  $\alpha_{\text{future}}$ ) does not solve  $t$ ; and
- if  $\delta[t] = j$  and the  $j$ -th algorithm is determined from  $C$  (that is  $\sigma[j] \in \mathcal{A} \cap X_i$  or  $\sigma[j]$  is the index of the first “past” or “future”, respectively), then the  $j$ -th algorithm defined by  $C$  solves  $t$ .

Note that if we take any valid schedule, we can project it w.r.t. a bag  $X_i$  and obtain a configuration  $(\alpha_{\text{past}}, \alpha_{\text{future}}, \sigma, \delta)$ . Such a configuration will always be admissible and so we can restrict our attention to admissible configurations only.

To simplify the notation we let  $\Gamma_i[C] = \infty$  if  $C$  is not an admissible configuration w.r.t.  $X_i$ .

**Claim 12.** *There are at most  $2^\ell \cdot \ell^{|X_i|} \cdot |X_i|! \cdot m^2$  admissible configurations.*



390 *Proof of Claim.* First, there are at most  $m^2$  possibilities for the algorithms  $\alpha_{\text{past}}$  and  $\alpha_{\text{future}}$ . Now,  
 391 let  $a, b \in \mathbb{N}$  be such that  $a = |X_i \cap \mathcal{A}|$  and  $b = |X_i \cap T|$ . Note that  $a + b = |X_i|$ . There  
 392 are  $\binom{\ell}{a} \leq \ell^a$  possible position for the algorithms of  $X_i$  in  $\sigma$  and for each of these we have  $|X_i|!$   
 393 possibilities for the specific algorithm to be at the given position. Then we have  $2^{\ell-a}$  possibilities for  
 394 the remaining entries of  $\sigma$ . Finally, there are  $\ell^b$  functions from  $X_i \cap T$  to  $[\ell]$ . Hence there are at most  
 395  $m^2 \cdot \ell^a \cdot a! \cdot 2^{\ell-a} \cdot \ell^b \leq 2^\ell \cdot \ell^{|X_i|} \cdot |X_i|! \cdot m^2$  admissible configurations.  $\square$

396 Now for each  $X_i$ , we will compute a table  $\Gamma_i$  that contains an entry for each admissible configuration  
 397  $C$  such that  $\Gamma_i[C] \in \mathbb{N}$  is the best cost, w.r.t. configuration  $C$ , of the already introduced tests restricted  
 398 to the already introduced algorithms and the algorithm  $\alpha_{\text{future}}$ .

399 Clearly, the minimum cost schedule of the instance gives rise to some admissible configuration  $C$   
 400 w.r.t. the root node  $X_r$  of the tree decomposition. Hence  $\Gamma_r[C]$  contains the minimum cost of a  
 401 schedule of length  $\ell$ . In the remainder of the proof, we show how to update the respective nodes of  
 402 tree decomposition depending on their children.

403 **Claim 13.** *If  $X_i$  is a leaf node, then  $\Gamma_i$  can be computed in  $\mathcal{O}(|\Gamma_i|)$  time.*

404 *Proof of Claim.* Note that  $X_i = \emptyset$  and that none of the algorithms has been introduced in any leave  
 405 node. Let  $\sigma_{\text{future}}$  denote the function  $\sigma_{\text{future}}[i] = \text{“future”}$  for all  $i \in [\ell]$ . Then the only admissible  
 406 configuration looks like  $(\emptyset, \alpha, \sigma_{\text{future}}, \emptyset)$ , where  $\alpha \in \mathcal{A}$ . Moreover, since no tests or algorithms were  
 407 introduced at that point, the cost of all of these configurations is zero.  $\square$

408 **Claim 14.** *If  $X_i$  is an introduce node for a test with the only child  $X_j$ , then  $\Gamma_i$  can be computed in  
 409  $\mathcal{O}(|\Gamma_i|)$  time.*

410 *Proof of Claim.* Let  $t$  be the newly introduced test and let  $C = (\alpha_{\text{past}}, \alpha_{\text{future}}, \sigma, \delta)$  be an admissible  
 411 configuration w.r.t.  $X_i$ . Note that since,  $X_j$  is a separator between the forgotten algorithms and  $t$ , it  
 412 follows that  $\alpha_{\text{past}}$  solves  $t$  and hence, because  $C$  is admissible, the index  $\delta[t]$  of the algorithm that solve  
 413 the test  $t$  has to be smaller or equal to the index of the first “past” in  $\sigma$ . Hence, it is simple to compute  
 414 the cost  $c_t$  of  $t$  w.r.t. all already introduced algorithms and  $\alpha_{\text{future}}$ . Moreover, this cost is unique and  
 415 does not depend on forgotten algorithms other than  $\alpha_{\text{past}}$ . Now, let  $C' = (\alpha_{\text{past}}, \alpha_{\text{future}}, \sigma, \delta')$  be the  
 416 configuration w.r.t.  $X_j$ , where  $\delta'$  is the restriction of  $\delta$  missing the entry for  $t$ . Since  $\Gamma_j[C']$  contains  
 417 the best cost w.r.t.  $C'$  and the difference between  $C'$  and  $C$  and between  $X_j$  and  $X_i$  respectively is  
 418 only the test  $t$ , it is easy to observe that  $\Gamma_i[C] = \Gamma_j[C'] + c_t$ .  $\square$

419 **Claim 15.** *If  $X_i$  is an introduce node for an algorithm with the only child  $X_j$ , then  $\Gamma_i$  can be  
 420 computed in  $\mathcal{O}(|\Gamma_i|)$  time.*

421 *Proof of Claim.* Let  $C = (\alpha_{\text{past}}, \alpha_{\text{future}}, \sigma, \delta)$  be an admissible configuration w.r.t.  $X_i$  and let  $\alpha$  be  
 422 the newly introduced algorithm. We compute  $\Gamma_i[C]$  as follows. Let  $\sigma' : [\ell] \rightarrow \{\text{“past”}, \text{“future”}\} \cup$   
 423  $(\mathcal{A} \cap X_i)$  be the function such that  $\sigma'[k] = \sigma[k]$  if  $\sigma[k] \neq \alpha$  and  $\sigma'[k] = \text{“future”}$  if  $\sigma[k] = \alpha$ .

424 We distinguish two cases depending on the position of  $\alpha$  in  $\sigma$ .

425 First,  $\sigma[k] = \alpha$  and there exists  $k' \in \mathbb{N}$  such that  $k' < k$  and  $\sigma[k'] = \text{“future”}$ . Let  $C'$  denote  
 426 configuration  $(\alpha_{\text{past}}, \alpha_{\text{future}}, \sigma', \delta)$ . Clearly,  $\sigma'$  is admissible w.r.t.  $X_j$ . Furthermore, all already  
 427 forgotten tests are solved by  $\alpha_{\text{future}}$ , which is before  $\alpha$  in  $\sigma$  and hence their costs is already accounted  
 428 for in  $\Gamma_j[C']$ . Therefore, we only need to account for the tests in  $X_i$  which are solved either by  $\alpha$  or  
 429 later. Let  $k \in \mathbb{N}$  be such that  $\sigma[k] = \alpha$ . We let  $\Gamma_i[C] = \Gamma_j[C'] + \sum_{t \in \{t' \mid \delta[t'] \leq k\}} \text{cost}(\alpha, t)$ .

430 Second,  $\sigma[k] = \alpha$  and there does not exist  $k' \in \mathbb{N}$  such that  $k' < k$  and  $\sigma[k'] = \text{“future”}$ . We let  $C'$   
 431 denote configuration  $(\alpha_{\text{past}}, \alpha, \sigma', \delta)$ . Clearly,  $\sigma'$  is admissible w.r.t.  $X_j$ . All already forgotten tests  
 432 are solved latest by  $\alpha$  and their costs is already accounted for in  $\Gamma_j[C']$ . However, we added new  
 433  $\alpha_{\text{future}}$  in this case and we have to add the cost of running  $\alpha_{\text{future}}$  for the tests in  $X_i$  that are solved after  
 434 the first “future” in  $\sigma$ . Let  $k \in \mathbb{N}$  be such that  $\sigma[k] = \text{“future”}$  and for all  $k' < k$  is  $\sigma[k'] \neq \text{future}$ .  
 435 We let  $\Gamma_i[C] = \Gamma_j[C'] + \sum_{t \in \{t' \mid \delta[t'] \leq k\}} \text{cost}(\alpha_{\text{future}}, t)$ .  $\square$

436 **Claim 16.** *If  $X_i$  is a forget node, which forgets a test  $t$ , with the only child  $X_j$ , then  $\Gamma_i$  can be  
 437 computed in  $\mathcal{O}(\ell|\Gamma_i|)$  time.*

438 *Proof of Claim.* Let  $C = (\alpha_{\text{past}}, \alpha_{\text{future}}, \sigma, \delta)$  be an admissible configuration w.r.t.  $X_i$ . Forgetting a  
 439 test does not change the costs of introduced tests w.r.t. introduced algorithms. Hence, we only need  
 440 to find a configuration w.r.t.  $X_j$  of the lowest cost that after removing  $t$  from  $\delta$  results in  $C$ . For  
 441  $k \in [\ell]$  let  $C_k$  be a configuration  $(\alpha_{\text{past}}, \alpha_{\text{future}}, \sigma, \delta_k)$  such that  $\delta_k[t'] = \delta[t']$  for  $t' \in (X_i \cap T)$  and  
 442  $\delta_k[t'] = k$ . We let  $\Gamma_i[C] = \min_{k \in [\ell]} \Gamma_j[C_k]$ .  $\square$

443 **Claim 17.** *If  $X_i$  is a forget node, which forgets an algorithm  $\alpha$ , with the only child  $X_j$ , then  $\Gamma_i$  can*  
 444 *be computed in  $\mathcal{O}((\ell + m)|\Gamma_i|)$  time.*

445 *Proof of Claim.* Let  $C = (\alpha_{\text{past}}, \alpha_{\text{future}}, \sigma, \delta)$  be an admissible configuration w.r.t.  $X_i$ . Clearly, when  
 446 we forget an algorithm, the cost of schedule given by  $\sigma$  w.r.t already introduced algorithms and tests  
 447 does not change. Hence, we just need to choose the best configuration of  $X_j$  that can result in  $C$ .  
 448 Let  $k$  be the lowest index such that  $\sigma[k] = \text{"past"}$ . We distinguish two cases depending on whether  
 449  $\alpha_{\text{past}} = \alpha$  or not.

450 First, if  $\alpha_{\text{past}} = \alpha$ , then for an already forgotten algorithm  $\alpha'$  let us denote by  $C_{\alpha'}$  the configuration  
 451  $(\alpha', \alpha_{\text{future}}, \sigma', \delta)$  such that  $\sigma'[k] = \alpha$  and for all  $k' \neq k$   $\sigma'[k'] = \sigma[k']$ . In this case we let  $\Gamma_i[C] =$   
 452  $\min_{\alpha'} \Gamma_j[C_{\alpha'}]$ .

453 If  $\alpha_{\text{past}} \neq \alpha$ , then for all  $k' > k$  such that  $\sigma[k'] = \text{"past"}$  we let  $C_{k'}$  be the configura-  
 454 tion  $(\alpha_{\text{past}}, \alpha_{\text{future}}, \sigma_{k'}, \delta)$  such that  $\sigma'[k'] = \alpha$  and  $\sigma'[k''] = \sigma[k'']$  for  $k'' \neq k'$ . We let  
 455  $\Gamma_i[C] = \min_{k'} \Gamma_j[C_{k'}]$ .  $\square$

456 **Claim 18.** *If  $X_i$  is a join node with children  $X_{j_1}$  and  $X_{j_2}$ , then  $\Gamma_i$  can be computed from  $\Gamma_{j_1}$  and*  
 457  *$\Gamma_{j_2}$  in  $\mathcal{O}(2^\ell m |\Gamma_i|)$  time.*

458 *Proof of Claim.* Let  $C = (\alpha_{\text{past}}, \alpha_{\text{future}}, \sigma, \delta)$  be an admissible configuration w.r.t.  $X_i$ . In this case,  
 459 we need to go through all the possibilities how  $C$  can decompose into two admissible configurations  
 460  $C_{j_1} = (\alpha_{\text{past}}^1, \alpha_{\text{future}}^1, \sigma^1, \delta^1)$  and  $C_{j_2} = (\alpha_{\text{past}}^2, \alpha_{\text{future}}^2, \sigma^2, \delta^2)$  w.r.t.  $X_{j_1}$  and  $X_{j_2}$ , respectively. We  
 461 first enumerate the necessary conditions for such two configurations.

- 462 1.  $\delta = \delta^1 = \delta^2$ ,
- 463 2.  $\sigma, \sigma^1$ , and  $\sigma^2$  agree on the position of the algorithms in  $X_i$ ,
- 464 3. if  $\sigma[k] = \text{"future"}$ , then necessarily  $\sigma^1[k] = \sigma^2[k] = \text{"future"}$ ,
- 465 4. if  $\sigma[k] = \text{"past"}$  then either  $\sigma^1[k] = \text{"past"}$  and  $\sigma^2[k] = \text{"future"}$  or  $\sigma^1[k] = \text{"future"}$  and  
 466  $\sigma^2[k] = \text{"past"}$ ,
- 467 5.  $\alpha_{\text{past}}$  has to be equal to either  $\alpha_{\text{past}}^1$  or  $\alpha_{\text{past}}^2$ , and
- 468 6.  $\alpha_{\text{future}}^1$  is either  $\alpha_{\text{future}}$  or  $\alpha_{\text{past}}^2$  and  $\alpha_{\text{future}}^2$  is either  $\alpha_{\text{future}}$  or  $\alpha_{\text{past}}^1$ .

469 It is straightforward to see that there are at most  $2^\ell + 2 \cdot m$  such  $(C_{j_1}, C_{j_2})$  pairs. Having such a pair  
 470 and costs  $\Gamma_{j_1}[C_{j_1}]$ ,  $\Gamma_{j_2}[C_{j_2}]$ , we show how to compute the cost of  $C$  if it rises from the combination  
 471 of  $C_{j_1}$  and  $C_{j_2}$ . Afterwards, we just need to go through all the combinations and pick the one that  
 472 gives the lowest possible cost.

473 First note that the sets of tests that are forgotten in  $X_{j_1}$  and  $X_{j_2}$  are disjoint, and the cost of these  
 474 tests is included in  $\Gamma_{j_1}[C_{j_1}]$  and  $\Gamma_{j_2}[C_{j_2}]$  respectively and this cost will not change after joining  
 475 these to configurations. This is true since the only not introduced algorithms, in the respective bags,  
 476 that will run on these tests are  $\alpha_{\text{future}}^1$  and  $\alpha_{\text{future}}^2$ , respectively, and their costs are already included  
 477 in  $\Gamma_{j_1}[C_{j_1}]$  and  $\Gamma_{j_2}[C_{j_2}]$ . Hence, if  $X_i$  does not contain any test, then the cost of combining these  
 478 two configurations is precisely  $\Gamma_{j_1}[C_{j_1}] + \Gamma_{j_2}[C_{j_2}]$ . Similarly, for a test  $t \in X_i$  and a forgotten  
 479 algorithm other than  $\alpha_{\text{past}}^1$  or  $\alpha_{\text{past}}^2$  (which could be  $\alpha_{\text{future}}^2$  or  $\alpha_{\text{future}}^1$ , respectively) the cost of running  
 480 this algorithm is already counted in precisely one of  $\Gamma_{j_1}[C_{j_1}]$  and  $\Gamma_{j_2}[C_{j_2}]$ . Hence, the only thing  
 481 that can be counted twice in  $\Gamma_{j_1}[C_{j_1}] + \Gamma_{j_2}[C_{j_2}]$  is the cost of running a test in  $X_i$  w.r.t. algorithm in  
 482  $X_i \cup \{\alpha_{\text{future}}, \alpha_{\text{future}}^1, \alpha_{\text{future}}^2\}$ , which can be easily checked, computed from  $\sigma$ 's and  $\delta$ , and afterwards  
 483 subtracted from  $\Gamma_{j_1}[C_{j_1}] + \Gamma_{j_2}[C_{j_2}]$ . Finally, if none of  $\alpha_{\text{future}}^1$  and  $\alpha_{\text{future}}^2$  is equal to  $\alpha_{\text{future}}$ , we need  
 484 to add to the final cost the cost of running  $\alpha_{\text{future}}$  on tests that are in  $X_i$  and are solved at least at the  
 485 position of the first "future" in  $\sigma$  or later (e.g.,  $\delta[t] \geq k$ , where  $k$  is the position of the first "future"  
 486 in  $\sigma$ ). This conclude the computation of the costs of combining two configurations from children in  
 487 join node and by taking the minimum among all such combinations also the proof of the claim.  $\square$

488 To conclude, the last four claims show that it is possible to dynamically compute our records from the  
 489 leaves of a nice tree decomposition to its root; once the records are known for the root, the algorithm  
 490 has all the information it needs to output with the solution.  $\square$

491 Since, by Lemma 9 the length of a minimum cost schedule is at most  $(2tw(G_{\mathcal{I}}) + 5) \cdot \log(n + m)$ ,  
 492 by applying the above algorithm for each length between 1 and  $(2tw(G_{\mathcal{I}}) + 5) \cdot \log(n + m)$  we  
 493 get a runtime of  $\mathcal{O}^*(4^{(2tw(G_{\mathcal{I}})+5) \cdot \log(n+m)} \cdot ((2tw(G_{\mathcal{I}}) + 5) \cdot \log(n + m))^{tw(G_{\mathcal{I}})} \cdot tw(G_{\mathcal{I}})!) =$   
 494  $\mathcal{O}^*(4^{2tw(G_{\mathcal{I}})+5} \cdot (2tw(G_{\mathcal{I}}) + 5)^{tw} \cdot \log(n + m)^{tw(G_{\mathcal{I}})} \cdot tw(G_{\mathcal{I}})!)$ . It is well known [20] that, for

a parameter  $k$  and input size  $N$ , a running time of the form  $\mathcal{O}^*((\log(N))^k)$  is FPT. It follows that CPS[*failure treewidth*] is fixed-parameter tractable, and the proof of Theorem 7 is complete.

## 5.2 Using the Success Cover Number

The aim of this section is to establish the fixed-parameter tractability of CPS[*success cover number*], which can be viewed as a dual result to Corollary 8. The techniques used to obtain this result are entirely different from those used in the previous subsection; in particular, the proof is based on a significant extension of the ideas introduced in the proof of Proposition 1.

**Theorem 19.** CPS[*success cover number*] is in FPT.

*Proof.* Let  $\mathcal{I}$  be an instance of CPS[cov<sub>s</sub>]. Our first step is to compute a witness for the success cover number cov<sub>s</sub>, i.e., a set of algorithms  $\mathcal{A}'$  and tests  $T'$  such that  $|\mathcal{A}' \cup T'| = \text{cov}_s$  and each pair in  $S$  has a non-empty intersection with  $\mathcal{A}' \cup T'$ ; as discussed in Subsection 2, this can be done in polynomial time [8, Proposition 1]. Let  $V = 2^{\mathcal{A}' \cup T'}$  be the set of all subsets of cov<sub>s</sub>. We will construct a directed arc-weighted graph  $D$  with vertex set  $V \cup \{x\}$ , and with the property that each shortest path from  $\emptyset$  to  $x$  precisely corresponds to a minimum-cost schedule for the input instance  $\mathcal{I}$ . Intuitively, reaching a vertex  $v$  in  $D$  which corresponds to a certain set of algorithms  $\mathcal{A}_0$  and tests  $T_0$  means that the schedule currently contains the algorithms in  $\mathcal{A}_0$  plus an optimal choice of algorithms which can process the remaining tests in  $T_0$ ; information about the ordering inside the schedule is not encoded by the vertex  $v$  itself, but rather by the path from  $\emptyset$  to  $v$ .

In order to implement this idea, we will add the following arcs to  $D$ . To simplify the description, let  $\mathcal{A}^*$  be an arbitrary subset of  $\mathcal{A}'$  and  $T^*$  be an arbitrary subset of  $T'$ . First of all, for each  $\mathcal{A}^*$  such that for every test  $t \in T \setminus T'$  there is some  $\alpha \in \mathcal{A}^*$  satisfying  $(\alpha, t) \in S$ , we add the arc  $(\mathcal{A}^* \cup T', x)$  and assign it a weight of 0. This is done to indicate that  $\mathcal{A}^* \cup T'$  corresponds to a valid schedule.

Second, for each  $\mathcal{A}^*$  that is a proper subset of  $\mathcal{A}'$ ,  $\alpha_0 \in \mathcal{A}' \setminus \mathcal{A}^*$ , and  $T^*$ , we add the arc  $e$  from  $\mathcal{A}^* \cup T^*$  to  $\mathcal{A}^* \cup \{\alpha_0\} \cup T^* \cup T_0$ , where  $T_0$  contains every test  $t_0 \in T'$  such that  $(\alpha_0, t_0) \in S$ . In order to compute the weight of this arc  $e$ , we first compute the set  $T_e$  of all tests outside of  $T^*$  where  $\alpha_0$  will be queried (assuming  $\alpha_0$  is added to the schedule at this point); formally,  $t \in T_e$  if  $t \notin T^*$  and for each  $\alpha' \in \mathcal{A}^*$  it holds that  $(\alpha', t) \notin S$ . For clarity, observe that  $T_0 \subseteq T_e$ . Now, we set the weight of  $e$  to  $\sum_{t \in T_e} \text{cost}(\alpha_0, t)$ .

To add our third and final set of edges, we first pre-compute for each  $T_\lambda \subseteq T' \setminus T^*$  an algorithm  $\alpha_\lambda \in \mathcal{A} \setminus \mathcal{A}'$  such that:

1. for each  $t_\lambda \notin T^*$ ,  $(\alpha_\lambda, t_\lambda) \in S$  iff  $t_\lambda \in T_\lambda$  (i.e.,  $\alpha_\lambda$  successfully solves exactly  $T_\lambda$ ), and
2. among all possible algorithms satisfying the above condition,  $\alpha_\lambda$  achieves the *minimum cost* for all as-of-yet-unprocessed tests. Formally,  $\alpha_\lambda$  minimizes the term  $\text{price}(\alpha_\lambda) = (\sum_{t \in (T' \setminus T^*)} \text{cost}(\alpha_\lambda, t)) + (\sum_{t \notin T': \forall \alpha \in \mathcal{A}^*: (\alpha, t) \notin S} \text{cost}(\alpha_\lambda, t))$ .

Now, we add an arc  $e$  from each  $\mathcal{A}^* \cup T^*$  to each  $\mathcal{A}^* \cup T^* \cup T_\lambda$ , where  $T_\lambda$  is defined as above and associated with the test  $\alpha_\lambda$ . The weight of  $e$  is precisely the value  $\text{price}(\alpha_\lambda)$ .

Note that since the graph  $D$  has  $2^{\text{cov}_s} + 1$  many vertices, a shortest path  $P$  from  $\emptyset$  to  $x$  in  $D$  can be computed in time  $2^{\mathcal{O}(\text{cov}_s)}$ . Moreover, it is easy to verify that  $D$  can be constructed from an instance  $\mathcal{I}$  in time at most  $2^{\mathcal{O}(\text{cov}_s)} \cdot |\mathcal{I}|^2$ . At this point, it remains to verify that a shortest  $\emptyset$ - $x$  path  $P$  in  $D$  can be used to obtain a solution for  $\mathcal{I}$ .

Consider such a path  $P$ , and let  $Q$  be the schedule constructed iteratively as follows. At the beginning we set  $Q = \emptyset$ . We will follow the path  $P$  from  $\emptyset$  to  $x$  and add an algorithm to  $Q$  whenever  $P$  traverses an arc with non-zero weight. In particular, whenever  $P$  uses an arc from some  $\mathcal{A}^* \cup T^*$  to some  $\mathcal{A}^* \cup \{\alpha_0\} \cup T^* \cup T_0$  where  $\alpha_0 \in \mathcal{A}'$  (i.e., an arc from our second group of created edges), we add  $\alpha_0$  to the end of  $Q$ . Similarly, whenever  $P$  uses an arc from some  $\mathcal{A}^* \cup T^*$  to some  $\mathcal{A}^* \cup T^* \cup T_\lambda$ , we add the algorithm  $\alpha_\lambda$  to the end of  $Q$ . It is easy to verify that at each point of our iterative construction of  $Q$ , the cost of an arc used by  $P$  is precisely the same as the processing cost the algorithm that was last added to  $Q$  spends on all tests which remain unsolved at this point. Moreover, by the construction of our first group of arcs, once  $P$  reaches  $x$  we end up with a valid schedule  $Q$ . It follows that  $Q$  is a valid schedule with cost equal to the weight of  $P$ .

To conclude the proof, among all valid schedules of minimum cost, let  $Q'$  be one such schedule with the minimum weight. It now suffices to show that there exists a path  $P'$  with the same weight as

the cost of  $Q'$ . To find this path  $P'$ , we will be essentially be reversing the arguments made in the previous paragraph. Notably, we will find  $P'$  by choosing the  $i$ -th arc to follow based on the  $i$ -th algorithm in  $Q'$ . As our inductive assumption, we will moreover claim that:

1. if the  $i$ -th node we reach in  $P'$  is  $\mathcal{A}^* \cup T^*$ , then the first  $i$  algorithms in  $Q'$  contain  $\mathcal{A}^*$  and that the algorithms in  $Q'$  solve precisely those tests in  $T'$  which lie in  $T^*$ ; and
2. the weight of  $P'$  up to the  $i$ -th node is precisely equal to the cost of processing all tests by the first  $i$  algorithms in  $Q'$ .

This inductive assumption is clearly true at position  $i = 0$ , since  $P'$  starts at  $\emptyset$ . So, assume the inductive assumption holds at some position  $i$ , the vertex reached by  $P'$  after taking the  $i$ -th arc is some  $\mathcal{A}^* \cup T^*$ , and the  $(i + 1)$ -st algorithm in  $Q'$  is some  $\alpha_j$ .

If  $\alpha_j \in \mathcal{A}'$ , then we make our path  $P'$  follow the arc to  $\mathcal{A}^* \cup \{\alpha_j\} \cup T^* \cup T_0$ , where  $T_0$  contains every test  $t_0 \in T'$  such that  $(\alpha_j, t_0) \in S$ ; such an arc can be found among the arcs created in our second group, the set  $T_0$  is constructed in a way which preserves our first inductive assumption, and the cost of this arc will precisely match the cost of processing all remaining tests by  $\alpha_j$ . Hence, both inductive assumptions will remain satisfied.

On the other hand, if  $\alpha_j \notin \mathcal{A}'$ , then due to the optimality of  $Q'$  we can assume that there exists some non-empty set  $T_\lambda \subseteq T' \setminus T^*$  of tests solved by  $\alpha_j$ , i.e.,  $t \in T_\lambda$  iff  $(\alpha_j, t) \in S$ . To be more precise, observe that an  $\alpha_j$  outside of  $\mathcal{A}'$  can only successfully process tests in  $T'$ , and if such  $\alpha_j$  does not succeed on any as-of-yet remaining test we may simply remove  $\alpha_j$  from  $Q'$ , contradicting our assumption about the (length) minimality of  $Q'$ . Moreover, among *all* algorithms which succeed precisely on  $T_0$ , we note that  $\alpha_j$  must run with the minimum cost for all test instances that remain unsolved as of this point—in other words,  $\alpha_j$  must be an algorithm with minimum price, as defined when constructing our third set of edges. Indeed, if this were not the case, we could replace  $\alpha_j$  with the algorithm  $\alpha_\lambda$  pre-computed for  $T_\lambda$ , leading to a schedule  $Q'$  of strictly smaller cost. But since  $\alpha_j$  is an algorithm with minimum price, there must exist an arc from  $\mathcal{A}^* \cup T^*$  to  $\mathcal{A}^* \cup T^* \cup T_\lambda$  of cost precisely  $\text{price}(\alpha_j)$ , and by having  $P'$  use this arc we ensure that both inductive assumptions remain valid (the first assumption follows from the definition of  $T_\lambda$ , and the second follows from the optimality of the price of  $\alpha_j$ ).

To summarize, we have shown that for each valid optimal schedule  $Q'$  as defined above, there is a corresponding  $\emptyset$ - $x$  path  $P'$  in our graph  $D$ , and that for each  $\emptyset$ - $x$  path  $P$  in  $D$  there is a corresponding valid schedule. These two facts together establish the correctness of our algorithm.  $\square$

## 6 Conclusion

We studied the parameterized complexity of the CASCADING PORTFOLIO SCHEDULING problem under various parameters. We identified several settings where the NP-hardness of the problem can be circumvented via exact fixed-parameter algorithms, including cases where (i) the algorithms have a small failure degree, (ii) the tests have a small failure degree, (iii) the evaluation matrix has a small failure cover, and (iv) the evaluation matrix has a small success cover. The first three cases can be seen as settings in which most algorithms succeed on most of the tests, whereas case (iv) can be seen as a setting where most algorithms fail.

We have complemented our algorithmic results with hardness results which allowed us to draw a detailed complexity landscape of the problem. We would like to point out that all our hardness results hold even when all costs are unit costs. This finding is significant, as it reveals that the complexity of the problem mainly depends on the success relation and not on the cost mapping.

For future work, it would be interesting to extend our study to the more complex setting where up to  $p$  algorithms from the portfolio can be run in parallel. Here, the number  $p$  could be seen as a natural additional parameter.

## References

- [1] H. L. Bodlaender. Discovering treewidth. In *Proceedings of the 31st Conference on Current Trends in Theory and Practice of Computer Science (SOFSEM'05)*, volume 3381 of *Lecture Notes in Computer Science*, pages 1–16. Springer Verlag, 2005.
- [2] Hans L. Bodlaender, Pål Grønås Drange, Markus S. Dregi, Fedor V. Fomin, Daniel Lokshantov, and Michał Pilipczuk. A  $c^k n$  5-approximation algorithm for treewidth. *SIAM J. Comput.*,

- 599 45(2):317–378, 2016.
- 600 [3] T. Cormen, C. Leiserson, R. Rivest, and C. Stein. *Introduction to Algorithms*. The MIT Press,  
601 3rd edition, 2009.
- 602 [4] M. Cygan, F. Fomin, L. Kowalik, D. Lokshantov, D. Marx, M. Pilipczuk, M. Pilipczuk, and  
603 S. Saurabh. *Parameterized Algorithms*. Springer, 2015.
- 604 [5] Rodney G. Downey and Michael R. Fellows. *Fundamentals of Parameterized Complexity*. Texts  
605 in Computer Science. Springer, 2013.
- 606 [6] Uriel Feige, László Lovász, and Prasad Tetali. Approximating min sum set cover. *Algorithmica*,  
607 40(4):219–234, 2004.
- 608 [7] Jörg Flum and Martin Grohe. *Parameterized Complexity Theory*, volume XIV of *Texts in*  
609 *Theoretical Computer Science. An EATCS Series*. Springer Verlag, Berlin, 2006.
- 610 [8] Robert Ganian, Iyad Kanj, Sebastian Ordyniak, and Stefan Szeider. Parameterized algorithms  
611 for the matrix completion problem. In *Proceeding of ICML, the Thirty-fifth International*  
612 *Conference on Machine Learning, Stockholm, July 10–15, 2018*, pages 1642–1651. JMLR.org,  
613 2018. ISSN: 1938-7228.
- 614 [9] Georg Gottlob, Reinhard Pichler, and Fang Wei. Bounded treewidth as a key to tractability of  
615 knowledge representation and reasoning. *Artificial Intelligence*, 174(1):105–132, 2010.
- 616 [10] Georg Gottlob and Stefan Szeider. Fixed-parameter algorithms for artificial intelligence,  
617 constraint satisfaction, and database problems. *The Computer Journal*, 51(3):303–325, 2006.  
618 Survey paper.
- 619 [11] Holger H. Hoos, Tomáš Peitl, Friedrich Slivovsky, and Stefan Szeider. Portfolio-based algorithm  
620 selection for circuit QBFs. In John N. Hooker, editor, *Proceedings of CP 2018, the 24rd*  
621 *International Conference on Principles and Practice of Constraint Programming*, volume  
622 11008 of *Lecture Notes in Computer Science*, pages 195–209. Springer Verlag, 2018.
- 623 [12] Shinji Ito, Daisuke Hatano, Hanna Sumita, Akihiro Yabe, Takuro Fukunaga, Naonori Kakimura,  
624 and Ken-ichi Kawarabayashi. Regret bounds for online portfolio selection with a cardinality  
625 constraint. In *Advances in Neural Information Processing Systems 31: Annual Conference on*  
626 *Neural Information Processing Systems 2018, NeurIPS 2018, 3-8 December 2018, Montréal,*  
627 *Canada.*, pages 10611–10620, 2018.
- 628 [13] Pascal Kerschke, Holger H. Hoos, Frank Neumann, and Heike Trautmann. Automated algorithm  
629 selection: Survey and perspectives. *Evolutionary Computation*, pages 1–47, 2018.
- 630 [14] Lars Kotthoff. Algorithm selection for combinatorial search problems: A survey. *AI Magazine*,  
631 35(3):48–60, 2014.
- 632 [15] Marius Lindauer, Holger Hoos, Frank Hutter, and Kevin Leyton-Brown. Selection and configu-  
633 ration of parallel portfolios. In *Handbook of Parallel Constraint Reasoning.*, pages 583–615.  
634 2018.
- 635 [16] Marius Lindauer, Frank Hutter, Holger H. Hoos, and Torsten Schaub. Autofolio: An automati-  
636 cally configured algorithm selector (extended abstract). In Carles Sierra, editor, *Proceedings*  
637 *of the Twenty-Sixth International Joint Conference on Artificial Intelligence, IJCAI 2017, Mel-*  
638 *bourne, Australia, August 19-25, 2017*, pages 5025–5029. ijcai.org, 2017.
- 639 [17] Haipeng Luo, Chen-Yu Wei, and Kai Zheng. Efficient online portfolio with logarithmic regret.  
640 In *Advances in Neural Information Processing Systems 31: Annual Conference on Neural*  
641 *Information Processing Systems 2018, NeurIPS 2018, 3-8 December 2018, Montréal, Canada.*,  
642 pages 8245–8255, 2018.
- 643 [18] Rolf Niedermeier. *Invitation to Fixed-Parameter Algorithms*. Oxford Lecture Series in Mathe-  
644 matics and its Applications. Oxford University Press, Oxford, 2006.
- 645 [19] Luca Pulina and Armando Tacchella. A self-adaptive multi-engine solver for quantified boolean  
646 formulas. *Constraints*, 14(1):80–116, 2009.

- 647 [20] V. Raman, S. Saurabh, and C. R. Subramanian. Faster fixed parameter tractable algorithms  
648 for undirected feedback vertex set. In *Proceedings of the 13th International Symposium on*  
649 *Algorithms and Computation*, volume 2518 of *Lecture Notes in Computer Science*, pages  
650 241–248. Springer, 2002.
- 651 [21] John R. Rice. The algorithm selection problem. *Advances in Computers*, 15:65–118, 1976.
- 652 [22] Mattia Rizzini, Chris Fawcett, Mauro Vallati, Alfonso Emilio Gerevini, and Holger H. Hoos.  
653 Static and dynamic portfolio methods for optimal planning: An empirical analysis. *International*  
654 *Journal on Artificial Intelligence Tools*, 26(1):1–27, 2017.
- 655 [23] Neil Robertson and Paul D. Seymour. Graph minors. III. planar tree-width. *J. Comb. Theory,*  
656 *Ser. B*, 36(1):49–64, 1984.
- 657 [24] Olivier Roussel. Description of ppfolio 2012. In et al. A. Balint, editor, *Proceedings of SAT*  
658 *Challenge 2012*, page 47. University of Helsinki, 2012.
- 659 [25] Matthew Streeter. Approximation algorithms for cascading prediction models. In Jennifer G.  
660 Dy and Andreas Krause, editors, *Proceedings of the 35th International Conference on Machine*  
661 *Learning, ICML 2018, Stockholmsmässan, Stockholm, Sweden, July 10-15, 2018*, volume 80 of  
662 *JMLR Workshop and Conference Proceedings*, pages 4759–4767. JMLR.org, 2018.
